# Supplementary material for: Disruption of Pathological Patterns in a Young Population with Dysfunctional Breathing
Source: Evid Based Complement Alternat Med. 2020 Sep 19;2020:9614574. doi: 10.1155/2020/9614574 (PMC7532379; doi:10.1155/2020/9614574)
Supplement: Supplementary Materials — The Excel-format dataset used in this study. [file 9614574.f1.xlsx]

## Sheet: data_Park
gender_1male_2female	age	KNQ1	KNQ2	KNQ3	KNQ4	KNQ5	KNQ6	KNQ7	KNQ8	KNQ9	KNQ10	KNQ11	KNQ12	KNQ13	KNQ14	KNQ15	KNQ16	KNQ합	cs1	cs2	cs3	cs4	cs5	cs6	cs7	cs8	cs9	cs10	hs1	hs2	hs3	hs4	hs5	hs6	hs7	hs8	hs9	hs10	ljq01	ljq02	ljq03	ljq04	ljq05	ljq06	ljq07	ljq08	ljq09	ljq10	ljq11
1	18	2	2	1	3	2	2	2	1	1	1	1	1	1	3	1	1	25	6	6	2	6	3	3	3	2	2	6	3	3	2	2	2	5	1	1	2	2	2	2	2	2	2	2	2	2	2	2	6
1	20	0	0	1	0	0	0	0	0	0	0	0	0	0	0	0	0	1	2	6	1	1	1	1	1	1	1	4	1	1	1	1	1	2	1	1	1	1	1	1	1	1	1	1	1	1	1	1	1
1	22	2	2	2	4	1	2	2	2	3	2	2	2	2	2	3	2	35	2	2	2	2	2	2	2	2	2	2	2	2	2	2	2	2	2	2	2	2	1	1	1	1	1	2	1	1	1	1	1
2	20	0	0	0	0	0	0	0	0	2	2	0	2	2	2	2	2	14	2	4	3	3	4	3	3	3	3	3	6	6	3	3	5	5	3	3	3	3	2	2	2	2	2	2	2	2	2	3	5
2	19	1	2	2	1	0	1	0	1	3	1	0	0	0	3	1	1	17	5	6	4	5	5	2	3	4	3	5	2	3	5	4	3	5	4	3	4	5	5	4	4	4	3	4	5	5	6	5	4
1	19	2	1	1	2	0	0	0	1	0	0	0	0	0	0	1	0	8	5	5	2	1	1	2	1	3	3	3	7	6	2	1	1	4	2	2	2	2	2	2	2	4	2	2	2	2	4	2	2
2	18	1	1	0	2	0	0	0	0	1	0	0	0	0	2	1	1	9	4	5	4	6	4	2	4	3	3	2	2	2	2	2	4	2	2	2	2	2	3	3	2	1	2	1	1	3	1	1	4
2	20	0	1	1	2	0	0	0	0	2	2	0	0	0	0	0	0	8	1	1	1	1	1	1	1	1	1	1	4	4	4	4	1	4	1	1	1	1	3	3	3	1	1	1	1	2	1	2	2
2	20	2	2	2	2	2	1	1	1	3	0	0	1	1	3	1	2	24	3	3	5	5	3	2	1	3	3	2	5	2	2	3	4	5	3	5	4	2	2	5	4	4	4	5	1	6	3	3	5
2	21	2	2	1	1	0	0	1	2	3	1	0	1	0	1	0	2	17	2	4	4	5	3	1	1	1	5	4	5	5	4	4	5	5	1	1	2	2	4	5	1	3	5	3	4	5	3	2	1
2	20	1	1	1	2	0	0	0	1	1	0	0	0	1	2	2	0	12	5	5	4	4	4	4	3	4	4	4	3	5	4	4	4	4	4	4	4	4	4	4	5	3	3	3	3	3	1	1	1
2	20	2	2	2	2	1	2	2	2	2	0	2	0	0	2	2	2	25	5	5	4	4	1	5	2	2	2	5	6	5	5	5	5	3	5	5	1	2	2	4	5	5	5	5	5	5	5	5	5
2	18	1	2	1	3	1	0	0	0	0	0	0	0	0	2	2	2	14	2	2	1	4	1	1	1	1	1	1	7	5	4	3	2	6	2	1	1	1	2	1	2	3	1	1	1	1	1	1	1
1	19	1	0	0	1	0	0	2	1	1	0	2	0	0	0	1	1	10	4	3	1	1	1	2	5	3	4	5	6	6	1	1	2	5	4	1	1	1	6	7	1	5	1	1	6	6	4	5	5
1	18	0	2	3	0	0	0	0	0	2	0	0	0	0	0	0	1	8	3	4	1	1	1	1	1	1	1	4	4	1	1	1	2	4	1	1	1	1	1	1	1	1	2	1	1	1	1	1	3
2	20	1	1	2	1	0	1	1	2	3	0	0	1	0	0	2	1	16	3	4	4	4	3	3	3	2	2	2	5	4	3	3	3	5	5	4	2	2	2	2	3	4	5	5	2	4	3	5	2
1	19	1	2	1	1	1	1	1	1	2	1	1	1	1	1	1	1	18	2	5	3	2	2	1	1	2	4	2	6	4	3	4	4	5	2	2	4	5	5	5	4	4	5	5	3	3	4	4	3
1	18	1	2	2	1	1	2	2	1	1	1	1	1	3	1	2	1	23	2	4	3	2	1	1	1	1	1	2	2	2	1	1	3	4	1	1	1	1	3	4	1	1	3	3	1	2	1	2	2
2	19	1	1	3	3	0	3	3	3	1	0	0	0	0	4	2	0	24	7	7	2	6	6	2	2	2	2	2	2	2	2	2	2	5	2	2	2	2	1	1	1	1	1	1	1	4	1	1	1
2	19	0	0	2	2	1	0	0	0	1	0	0	0	0	2	1	0	9	4	5	2	1	1	1	1	1	5	2	3	2	2	1	5	1	1	1	5	1	4	5	1	1	1	1	1	5	1	1	1
2	19	2	3	2	2	1	1	0	1	2	0	0	0	0	2	1	3	20	4	4	3	6	6	1	3	3	3	3	4	2	1	1	5	4	2	2	2	2	5	5	3	1	4	2	2	2	2	2	4
2	19	2	1	4	4	0	0	0	3	3	0	0	0	0	2	0	0	19	4	1	5	5	6	2	1	1	1	5	4	3	1	1	1	7	3	3	1	1	5	3	2	1	5	5	2	7	5	5	2
2	20	0	1	1	0	0	1	1	0	0	0	1	0	0	0	1	1	7	1	1	1	1	1	1	1	1	1	1	4	1	1	1	1	1	1	1	1	1	4	2	1	1	1	1	2	2	1	1	1
1	20	0	0	1	1	0	0	0	0	0	2	0	0	0	2	1	0	7	3	1	2	3	1	1	1	5	1	6	6	7	5	2	5	3	2	1	2	3	5	5	3	2	2	5	1	4	1	5	3
1	19	0	1	1	0	1	0	1	0	0	0	0	0	1	0	0	0	5	1	3	1	2	1	1	1	1	1	1	6	1	1	3	4	4	1	4	2	2	2	5	4	3	3	2	3	2	2	2	6
1	21	0	2	1	1	0	2	0	0	0	0	0	0	0	2	0	0	8	2	2	1	1	2	1	4	2	6	4	6	7	2	2	4	3	2	1	3	2	4	4	6	4	2	5	4	3	3	2	1
2	19	0	0	1	0	0	0	0	0	0	0	0	1	0	0	0	0	2	6	5	1	1	2	1	1	1	1	1	1	2	5	1	1	1	1	1	1	1	1	1	1	1	1	1	1	1	1	1	2
2	20	0	1	1	3	0	1	0	0	1	0	0	1	0	1	1	1	11	4	5	1	2	1	1	1	1	2	2	4	4	1	1	2	4	1	1	2	1	3	2	1	1	1	1	2	2	2	3	4
1	19	0	0	0	0	0	0	0	1	1	0	0	2	0	2	0	1	7	6	6	3	3	3	2	2	3	3	2	5	4	2	2	2	3	3	3	2	2	5	5	5	5	5	3	3	3	4	4	4
2	19	0	1	0	3	0	0	0	0	3	0	0	0	0	0	0	0	7	1	3	1	1	2	4	1	1	1	1	6	3	3	1	1	5	2	2	2	2	4	4	6	1	1	1	4	5	5	5	2
1	21	0	1	0	0	0	0	0	0	3	0	0	0	0	3	1	1	9	5	5	2	6	5	5	4	2	2	5	6	5	6	5	5	5	5	3	3	3	3	2	6	5	3	2	2	3	5	3	6
2	24	1	2	2	2	1	1	0	1	2	0	0	1	0	4	2	2	21	6	6	5	6	5	3	2	4	6	4	1	1	1	1	1	1	1	1	1	1	1	1	4	4	5	3	5	3	2	3	6
1	20	1	3	1	1	0	0	0	0	0	0	0	0	0	0	1	2	9	5	4	1	1	1	5	1	1	1	4	7	6	4	7	1	7	1	1	1	1	5	5	7	7	7	4	1	6	1	1	1
2	20	2	1	1	2	0	0	0	1	2	1	0	0	0	2	0	1	13	2	7	1	1	1	1	1	1	1	2	5	4	1	1	1	1	1	1	1	1	2	1	2	2	6	1	2	2	4	4	7
1	22	2	1	1	1	0	0	0	1	4	1	0	1	0	2	2	3	19	7	7	4	5	3	2	1	2	2	4	3	2	7	5	5	6	2	1	2	5	5	2	3	6	3	3	2	6	5	6	4
1	20	0	0	1	2	1	0	0	0	0	0	0	0	0	1	1	0	6	3	5	4	3	3	2	2	5	4	3	4	3	2	4	2	3	3	2	2	1	3	3	4	3	3	1	4	3	4	3	2
1	20	1	0	1	1	0	0	0	0	0	1	0	0	0	0	1	0	5	1	1	1	1	1	1	1	4	4	3	5	5	1	1	5	5	1	1	1	1	3	1	1	1	1	1	1	1	1	1	1
1	20	2	2	1	2	2	2	2	2	0	1	3	0	0	0	1	2	22	2	2	3	2	1	1	1	1	1	2	6	4	3	2	1	4	4	4	4	4	3	3	6	4	3	4	2	2	2	4	5
1	19	1	1	0	1	0	1	0	1	0	0	1	0	0	0	0	1	7	4	3	3	3	2	2	1	1	4	5	7	6	4	3	4	6	3	5	3	3	3	4	2	2	2	2	1	2	2	3	6
1	21	1	2	0	1	0	0	0	0	0	0	0	2	1	0	1	0	8	1	4	1	4	1	1	1	1	2	5	7	6	7	1	1	4	4	2	1	5	2	2	4	4	4	5	4	4	2	6	2
2	20	1	2	3	3	1	1	1	3	3	0	2	0	0	1	1	1	23	5	6	4	2	2	1	1	1	1	3	4	4	2	5	6	6	4	4	5	3	5	5	5	6	5	5	3	5	3	2	2
1	19	1	2	0	0	0	0	0	1	0	0	1	0	0	0	2	2	9	4	4	2	3	3	3	2	4	2	2	2	2	2	3	1	3	2	2	2	2	2	2	5	5	5	2	2	2	2	4	2
1	20	1	1	1	1	0	0	0	1	4	1	1	1	2	3	2	2	21	5	4	4	6	4	4	1	2	2	4	4	4	3	3	5	5	4	5	4	3	3	3	3	3	3	3	3	6	3	3	3
2	19	1	3	1	3	3	1	1	1	2	0	0	0	0	3	2	3	24	3	7	2	2	2	1	1	1	1	1	1	1	1	1	1	6	1	1	1	1	2	5	5	4	4	4	4	5	2	5	6
1	19	0	0	0	0	0	0	0	0	0	0	0	0	0	0	0	0	0	5	5	1	1	1	1	1	1	1	1	5	5	3	1	1	5	1	1	1	1	3	2	5	3	3	6	1	1	1	1	3
2	18	2	0	0	1	0	0	0	0	1	1	0	0	0	2	0	0	7	1	1	5	5	1	1	1	1	1	1	6	6	1	1	1	1	1	1	5	1	1	1	1	1	1	1	4	3	1	1	1
1	21	1	1	2	1	0	0	0	1	2	1	0	0	0	2	0	2	13	5	6	5	3	2	1	1	2	4	2	5	4	1	2	2	5	2	1	1	1	1	1	2	4	4	1	1	4	1	4	5
2	20	0	0	0	2	0	0	0	0	0	0	0	0	0	3	0	0	5	6	7	4	5	1	1	1	1	2	2	1	1	1	1	1	1	1	1	1	1	2	1	1	1	1	1	1	5	1	1	2
1	19	1	2	0	0	0	0	0	1	0	0	0	0	0	0	2	1	7	4	6	1	5	1	1	1	1	1	1	4	4	1	1	1	6	4	1	1	1	6	4	1	4	4	4	5	3	4	4	4
2	19	0	0	0	2	0	0	0	1	1	1	1	0	0	3	0	0	9	6	6	4	5	3	3	1	2	2	5	4	3	3	3	5	5	2	2	2	2	2	4	4	4	3	5	1	5	4	5	5
1	19	1	1	1	1	1	0	0	0	0	0	0	0	0	1	0	0	6	6	6	3	3	2	1	1	3	1	6	5	2	1	1	1	6	5	1	1	1	6	5	1	7	3	3	1	5	1	3	7
2	20	0	0	2	3	1	0	1	0	1	0	0	0	0	1	0	1	10	4	5	3	1	1	1	1	1	1	1	4	2	1	1	1	6	1	1	1	1	2	5	1	6	5	1	1	1	1	5	6
2	19	1	1	2	2	0	0	1	2	0	1	0	1	0	1	2	1	15	3	5	2	1	2	2	6	4	4	4	5	4	3	2	1	3	3	3	3	2	2	5	7	5	5	4	5	3	4	6	7
1	18	1	3	3	3	3	3	4	3	3	1	4	4	2	2	2	2	43	7	7	4	4	6	6	2	4	4	3	4	4	4	5	5	5	4	3	3	3	4	4	4	4	5	5	5	5	4	4	6
1	20	0	2	2	1	2	1	1	0	1	0	0	0	0	2	1	1	14	3	5	3	5	4	2	2	2	5	4	5	3	2	5	2	4	4	2	3	2	4	5	3	3	5	5	3	5	5	5	3
1	20	0	3	2	2	1	1	0	0	2	0	0	0	0	2	0	0	13	6	6	3	3	1	1	1	4	1	6	4	1	2	1	3	4	1	5	1	1	5	6	2	3	2	2	2	6	2	6	6
1	20	3	2	0	0	0	0	0	2	2	0	0	1	0	0	0	2	12	1	1	2	1	1	1	1	1	1	1	5	3	3	1	1	5	1	1	1	1	2	3	1	1	4	1	1	1	1	2	5
1	21	1	0	0	2	1	0	1	0	0	0	1	0	1	1	0	0	8	6	7	4	4	4	4	1	4	4	4	3	3	1	1	1	6	1	1	1	5	3	2	1	1	5	6	1	1	1	1	1
2	20	1	2	0	1	0	1	1	0	2	0	2	0	0	3	2	0	15	5	5	4	5	2	1	1	1	1	1	1	1	3	1	3	1	1	3	1	1	1	1	1	1	3	1	1	4	1	1	1
2	21	0	0	0	0	0	0	0	0	0	0	0	0	0	2	0	0	2	2	4	1	4	1	1	1	1	1	4	2	2	2	2	2	4	1	1	1	1	2	2	2	2	2	2	2	4	2	2	2
2	19	0	0	0	0	0	0	0	1	1	0	1	1	1	0	1	1	7	3	4	3	2	3	3	4	4	3	2	3	3	2	3	3	4	4	2	3	3	2	3	3	4	4	3	2	2	2	1	2
2	19	0	0	0	2	0	0	0	0	0	0	0	0	0	0	0	0	2	2	4	1	1	1	1	1	1	1	5	1	1	1	1	1	4	1	1	1	1	4	4	1	4	4	1	4	4	1	1	1
1	21	0	1	2	0	0	2	2	0	1	1	0	0	1	2	1	0	13	2	7	1	2	2	1	1	4	3	4	5	3	1	3	1	4	1	1	1	1	2	1	1	2	2	2	2	2	1	1	2
1	20	0	3	0	0	2	0	0	0	0	0	0	0	0	2	2	3	12	4	4	4	4	4	4	4	4	4	4	4	4	4	4	4	4	4	4	4	4	1	1	1	1	1	1	1	1	1	1	1
1	20	0	0	2	2	2	1	1	0	2	0	1	0	0	3	0	0	14	5	5	5	5	3	2	1	2	3	5	2	4	1	4	5	5	2	2	2	2	4	2	1	1	4	4	2	6	2	2	2
1	20	1	1	2	1	0	0	0	0	0	0	0	0	2	0	0	0	7	2	5	2	1	5	1	1	1	1	1	4	2	2	1	1	5	1	1	1	1	1	1	2	1	1	1	1	4	1	1	1
1	21	0	0	0	0	0	0	0	0	1	0	0	0	0	1	1	1	4	3	4	3	3	3	2	1	1	1	5	6	6	4	6	5	6	1	1	1	1	1	1	1	1	5	1	1	4	2	1	1
1	21	3	2	1	2	0	1	1	2	1	3	1	0	0	0	2	2	21	4	4	3	3	3	2	2	2	2	2	5	5	7	5	4	5	4	3	3	3	4	3	3	3	3	2	2	2	2	2	4
1	21	0	1	0	0	2	1	1	0	1	1	0	0	0	0	1	2	10	4	5	3	3	3	3	3	3	3	3	4	3	4	3	3	3	3	3	3	3	2	5	4	5	6	4	3	3	3	3	4
1	21	0	1	0	2	1	0	0	0	0	0	0	1	0	0	1	1	7	6	6	2	3	1	1	1	1	1	1	1	1	1	1	1	3	1	1	1	1	2	1	4	3	2	3	2	2	2	2	3
2	21	2	3	1	2	3	1	4	2	3	0	4	2	2	4	3	3	39	6	7	4	5	6	4	6	6	3	4	3	5	2	2	5	2	2	2	2	3	5	5	5	6	7	7	5	4	7	6	5
2	19	2	2	2	2	1	0	0	0	2	1	0	3	1	2	2	1	21	7	7	4	4	4	2	3	2	2	3	3	3	3	4	4	4	1	1	1	1	4	4	6	5	6	3	3	2	6	6	5
1	21	0	2	0	2	1	0	0	0	0	0	0	0	0	0	0	0	5	6	4	5	3	1	2	1	4	7	1	7	6	5	4	4	6	4	1	1	1	4	4	3	2	2	2	5	5	2	2	5
2	21	0	0	3	1	0	0	0	0	2	0	0	0	0	1	0	0	7	6	6	3	3	2	2	1	2	5	2	4	3	2	2	5	5	5	2	2	1	2	4	5	2	5	2	1	2	5	5	5
1	22	0	0	0	4	0	2	0	0	3	0	0	0	0	0	0	0	9	6	7	3	4	4	1	1	1	1	6	1	3	4	1	1	6	4	1	1	1	2	2	4	1	1	1	1	5	1	1	3
2	20	0	0	1	2	0	2	3	0	3	0	0	0	0	3	0	1	15	7	6	4	2	2	2	6	4	4	1	5	2	2	2	2	2	2	2	2	2	6	4	3	2	4	4	2	4	2	2	5
1	19	2	2	1	1	1	1	1	2	2	0	0	1	0	0	0	1	15	5	5	2	2	2	2	3	2	2	2	2	2	2	2	2	3	2	2	2	2	2	2	2	4	4	4	3	4	4	3	4
1	22	0	1	3	2	2	2	2	2	2	2	1	1	1	1	1	1	24	5	3	3	3	3	4	4	4	4	4	4	3	4	3	4	3	4	3	4	3	4	3	4	3	4	3	4	3	4	3	4
2	20	2	2	3	4	1	1	1	2	3	1	2	0	0	3	4	1	30	1	4	3	2	3	2	3	4	6	3	6	7	7	3	2	5	6	2	5	3	6	5	2	3	2	6	1	5	2	4	7
2	22	1	2	2	3	0	0	1	1	2	0	0	0	2	4	2	2	22	7	7	4	4	5	2	5	4	4	2	1	2	1	2	1	4	1	1	4	1	2	2	5	2	6	2	1	2	2	2	4
2	20	2	2	1	2	2	1	0	2	0	0	2	0	0	3	3	3	23	6	6	3	4	2	2	2	3	3	6	5	5	3	3	2	3	1	1	1	1	2	3	5	2	6	2	1	4	5	5	5
1	20	2	3	2	3	2	1	1	3	2	0	2	1	2	3	3	3	33	2	6	2	3	2	2	1	2	2	4	5	5	2	3	2	6	2	2	4	2	5	3	2	7	6	3	2	2	2	2	6
1	21	2	1	0	1	0	0	0	1	1	0	0	1	1	2	1	0	11	6	6	4	4	7	4	1	2	6	7	2	5	2	1	5	6	2	2	2	2	7	5	2	2	6	2	1	1	1	4	5
2	21	0	1	1	0	1	0	0	0	0	0	0	0	0	1	1	1	6	3	5	1	2	2	1	1	2	1	2	4	5	5	2	4	5	2	1	1	1	2	5	3	2	5	3	2	2	1	2	3
1	20	0	0	0	1	0	0	1	0	1	1	0	0	0	0	0	1	5	2	2	1	1	1	1	1	1	1	1	5	5	3	3	3	4	3	3	3	3	2	2	4	3	2	2	1	4	2	2	6
1	21	0	2	1	0	0	0	0	0	0	0	0	0	0	3	0	0	6	2	3	4	1	1	1	1	5	1	6	4	5	2	5	2	6	1	1	1	1	1	1	1	1	1	1	1	1	1	1	1
1	20	0	0	0	0	0	0	0	0	0	0	0	0	0	0	0	0	0	1	1	1	1	1	1	1	2	2	4	5	5	5	5	1	5	1	1	1	1	1	1	5	3	3	3	1	1	1	1	5
1	20	1	1	0	0	1	0	0	2	0	0	0	0	0	0	0	0	5	5	5	4	2	1	1	2	1	1	6	5	5	1	1	2	5	2	4	2	2	2	2	2	1	6	5	1	3	2	3	2
1	20	0	0	0	0	0	0	0	0	0	0	0	0	0	0	0	0	0	3	4	3	3	3	3	3	2	2	6	5	2	2	2	2	3	3	3	2	2	2	2	2	2	2	2	2	2	2	2	2
1	21	1	1	2	2	1	0	0	1	0	0	0	0	0	0	1	1	10	7	7	2	3	3	1	1	4	5	6	2	6	2	5	4	4	5	1	1	3	6	6	1	3	1	6	1	1	5	1	3
1	21	0	0	1	1	1	0	0	0	0	1	0	1	0	1	1	0	7	2	4	2	2	1	1	1	2	2	2	6	5	3	3	2	6	3	2	2	2	2	2	2	3	2	2	3	2	2	3	3
1	19	1	1	0	0	0	0	0	1	0	0	0	0	0	2	1	1	7	3	5	2	3	1	1	1	4	2	4	5	6	1	1	5	4	4	4	1	5	5	6	5	4	6	4	1	4	1	1	5
2	34	2	3	0	3	2	0	0	0	3	2	1	2	0	4	4	4	30	6	6	2	2	2	2	6	2	2	6	2	2	5	2	2	2	2	2	2	2	6	5	6	4	7	6	6	6	6	6	6
2	20	0	1	0	0	0	0	0	1	2	0	0	0	0	3	0	1	8	7	5	4	4	3	1	1	2	2	5	2	3	3	2	2	6	2	2	1	1	3	2	2	5	6	2	3	5	5	4	2
2	20	1	0	2	2	3	0	0	1	1	0	1	1	0	4	1	1	18	4	2	5	6	2	3	4	5	1	3	6	4	4	4	5	1	1	2	5	1	2	2	5	5	7	1	1	7	3	7	7
1	20	0	1	3	3	1	1	0	0	2	0	2	0	0	0	2	2	17	5	4	5	4	6	3	1	2	4	3	2	5	2	2	2	7	4	4	3	3	2	2	5	3	5	4	1	4	3	5	7
1	20	1	3	4	3	1	1	1	2	2	3	1	1	1	4	3	3	34	4	5	3	3	5	3	1	3	3	3	6	3	1	2	2	2	2	2	2	2	6	3	1	3	6	2	2	5	5	5	6
1	21	2	3	3	3	3	1	2	3	1	0	1	2	1	2	3	4	34	3	6	4	3	2	6	2	2	2	6	6	7	3	6	7	7	3	2	1	6	6	5	2	6	2	6	6	6	6	5	2
1	20	2	1	2	1	1	1	1	2	2	0	1	0	0	1	2	2	19	5	5	4	3	4	3	3	2	5	3	3	3	3	3	3	3	3	2	4	3	5	4	3	3	3	5	5	5	4	4	3
1	23	1	2	0	1	2	2	4	2	2	1	3	2	0	2	2	2	28	1	5	1	1	1	1	1	1	5	5	7	4	1	1	1	6	1	1	1	1	1	1	3	1	5	6	1	1	1	6	1
2	21	1	2	1	3	2	1	2	0	1	1	3	1	0	4	2	1	25	7	7	5	3	5	4	2	4	5	6	3	5	2	5	3	6	3	3	1	2	3	5	6	5	7	4	6	5	4	7	5
2	20	1	1	0	2	0	0	0	0	1	0	0	0	0	1	1	1	8	5	4	3	2	2	2	1	2	1	2	3	5	4	4	3	6	4	4	1	2	1	1	1	4	5	3	2	5	3	4	4
1	20	0	0	2	2	1	2	1	0	2	0	1	1	1	1	1	1	16	5	5	6	6	1	2	2	2	2	2	5	4	4	4	2	4	4	4	4	4	2	2	2	4	4	6	1	2	2	4	4
1	19	2	2	3	0	1	0	0	2	3	0	0	0	0	1	1	1	16	3	4	1	3	2	2	1	2	1	2	1	4	1	4	5	4	4	1	1	1	3	2	4	5	7	3	7	5	6	4	5
1	20	1	1	1	2	1	1	1	0	2	0	0	0	0	0	1	0	11	3	4	3	2	1	1	6	2	2	5	4	6	5	4	2	2	2	2	4	1	4	4	2	4	5	5	2	4	3	3	3
1	20	1	1	1	1	1	0	0	0	0	0	0	0	0	2	1	1	9	6	5	5	3	2	2	1	4	5	6	3	4	3	3	2	4	2	2	2	4	5	5	4	4	4	5	4	3	2	2	3
2	20	2	2	3	3	0	1	0	2	3	0	1	1	1	2	2	2	25	3	3	3	5	5	4	5	3	2	4	5	6	3	4	5	5	2	5	5	2	3	6	2	3	4	5	3	5	4	3	5
2	21	1	1	1	2	1	1	1	2	1	0	0	0	0	4	1	1	17	5	3	4	3	3	3	2	2	2	2	3	2	2	2	5	5	5	3	4	2	6	5	2	4	3	3	5	2	5	6	2
2	20	2	2	1	3	3	0	1	2	3	0	1	1	0	3	2	2	26	6	6	5	4	5	4	2	1	5	4	3	5	3	3	3	3	6	2	4	3	3	3	6	5	4	4	5	6	6	7	5
2	19	1	1	0	2	0	0	0	0	1	0	0	0	0	2	0	0	7	7	7	2	5	1	2	4	2	2	5	1	1	1	1	2	2	2	2	1	2	4	4	2	3	5	3	1	3	5	3	5
2	19	1	2	2	2	1	2	1	2	1	0	0	1	0	2	2	3	22	4	4	4	3	3	3	1	2	2	2	4	4	4	4	4	4	4	4	3	3	2	2	5	4	4	2	4	2	4	4	3
1	21	2	4	3	4	2	2	2	2	4	0	2	0	0	4	4	3	38	7	7	4	6	1	5	1	4	5	6	6	5	3	2	2	4	2	2	1	4	7	7	5	5	6	6	3	7	5	4	4
2	30	0	1	0	3	0	0	0	0	1	1	0	0	0	1	1	1	9	6	6	2	2	3	1	1	5	3	4	2	2	1	2	2	4	2	1	2	2	4	4	2	2	4	5	3	3	2	3	2
1	21	0	0	2	0	0	0	0	0	1	2	1	0	1	0	0	1	8	6	6	2	2	1	1	1	2	2	4	6	2	1	1	1	4	1	1	1	1	3	5	7	4	2	2	2	5	3	2	5
1	20	0	1	1	1	1	1	0	0	0	0	0	0	0	0	0	1	6	7	7	1	1	1	1	1	1	1	7	2	6	1	1	5	7	2	2	2	5	6	6	2	5	4	4	2	5	5	5	2
2	20	0	1	1	1	1	0	0	1	0	0	2	0	0	0	2	2	11	6	6	5	3	3	2	2	2	4	7	2	2	2	2	2	4	2	2	2	2	2	4	6	4	5	3	1	1	4	5	6
2	20	0	2	3	1	4	1	2	1	0	0	0	0	0	3	1	1	19	4	4	3	3	3	3	3	3	3	4	4	4	2	2	2	2	2	2	2	2	2	2	4	3	5	5	2	5	2	5	3
1	22	1	2	1	1	2	1	3	1	0	0	1	1	1	3	0	1	19	6	5	5	7	5	4	4	5	5	5	5	3	4	3	4	6	3	3	3	3	3	3	3	5	4	3	4	6	5	6	5
2	21	3	3	3	2	1	1	1	2	4	1	4	1	4	1	1	1	33	2	2	1	2	2	1	7	4	2	6	7	7	7	7	4	2	3	6	2	7	2	1	1	1	6	7	2	5	5	7	7
2	22	1	3	2	2	2	1	2	1	1	1	1	2	1	3	2	1	26	3	3	4	2	3	4	2	3	4	3	5	5	4	4	5	6	4	3	5	4	5	5	6	6	6	6	3	4	6	6	6
1	21	2	0	0	1	0	0	0	0	2	0	0	1	0	3	0	0	9	2	2	1	1	1	1	1	1	1	3	6	6	6	6	5	7	7	4	3	2	1	1	1	3	3	5	1	1	1	3	1
1	24	1	1	2	1	0	0	1	0	2	0	2	0	0	2	0	1	13	5	3	4	3	4	3	2	4	7	4	4	5	3	2	3	3	3	1	1	1	2	2	3	2	2	2	5	3	3	3	4
2	22	1	1	1	2	1	1	1	0	0	2	1	2	0	0	3	2	18	2	5	1	1	1	1	6	2	5	2	6	5	3	1	4	2	3	3	3	3	2	5	5	4	5	5	2	2	2	5	3
2	23	0	0	2	2	2	2	2	0	2	2	2	0	0	0	2	0	18	1	3	3	3	3	3	4	3	3	3	6	6	5	5	4	4	4	4	5	4	3	3	3	4	5	5	1	2	6	6	5
2	22	0	1	2	3	0	1	0	1	0	1	1	2	0	4	2	1	19	6	7	4	4	4	2	2	1	1	1	4	2	1	4	4	5	5	4	5	2	1	2	4	5	5	4	3	4	6	6	1
2	21	1	2	1	2	1	0	1	0	3	2	0	0	0	2	2	2	19	6	6	5	4	2	5	1	3	6	3	5	2	5	5	3	6	3	1	5	5	2	2	6	3	2	3	1	6	3	2	2
2	23	1	2	2	2	1	0	0	2	2	0	0	1	0	3	2	2	20	5	6	4	3	4	2	1	4	3	4	4	4	5	3	3	3	3	3	3	3	3	3	5	4	4	4	3	3	5	6	3
2	23	1	3	3	4	3	1	1	0	3	0	1	0	0	1	2	3	26	4	6	2	2	5	4	2	3	2	3	2	2	5	3	1	4	3	2	4	1	3	5	5	3	6	3	2	6	5	5	5
2	21	0	3	1	2	2	0	3	0	1	1	2	2	3	0	0	2	22	6	7	2	2	6	2	1	2	2	5	2	5	3	5	2	5	2	2	1	2	2	2	5	5	6	6	2	3	4	5	3
2	21	3	2	0	3	1	1	0	2	3	0	0	0	0	0	0	1	16	2	2	4	3	4	3	2	1	4	4	6	6	6	6	4	5	4	2	2	2	2	3	3	2	5	2	2	4	4	4	4
1	23	1	1	0	2	1	0	0	0	3	0	1	0	0	0	2	1	12	2	3	2	1	1	1	1	1	2	6	7	6	5	2	2	7	6	2	2	2	4	7	4	3	3	7	1	4	3	3	7
1	22	0	2	1	2	0	1	1	0	3	0	0	2	0	4	0	1	17	6	6	4	3	3	3	2	2	2	2	2	2	3	3	3	5	4	4	4	4	2	2	2	2	6	6	1	4	3	6	6
1	22	2	1	0	0	0	0	0	2	0	0	0	0	0	0	0	0	5	2	6	1	1	4	1	1	3	5	3	6	5	2	4	4	6	5	3	5	4	5	5	3	2	2	2	1	2	2	2	2
1	25	2	3	3	2	2	0	0	0	3	0	0	0	1	0	2	4	22	2	6	3	3	3	1	1	1	1	4	5	5	5	5	6	5	6	3	3	3	2	2	2	6	6	6	2	2	5	4	6
1	24	0	1	0	0	0	0	0	0	1	0	0	0	0	0	0	0	2	4	5	4	1	1	1	1	1	1	4	5	5	1	2	1	3	3	3	1	1	1	2	4	2	4	5	2	4	1	2	3
1	23	0	0	0	0	0	0	0	0	1	0	1	0	0	1	0	2	5	3	4	2	1	1	2	3	4	7	7	2	2	2	1	4	4	3	1	1	3	3	6	3	2	5	1	2	2	2	1	4
1	21	0	2	2	2	2	1	1	0	3	0	1	1	0	4	1	1	21	6	6	4	3	1	2	1	6	5	4	3	2	1	4	5	7	2	2	5	4	2	2	6	7	6	6	1	5	3	2	7
1	22	1	1	1	1	2	0	0	0	1	2	0	2	0	0	0	0	11	2	4	5	1	3	2	3	4	6	3	5	2	2	3	5	6	4	1	5	4	2	2	5	3	5	2	5	1	4	2	2
1	22	2	2	1	1	1	2	1	2	1	2	2	0	0	0	2	2	21	4	4	3	2	3	2	1	2	4	5	4	4	4	4	4	5	5	3	3	4	4	5	3	3	4	5	2	2	2	3	5
1	26	1	2	2	1	2	1	1	1	1	0	1	2	1	3	2	1	22	6	6	5	4	5	4	2	5	4	4	2	3	2	3	4	3	4	4	2	2	2	2	3	4	5	4	4	3	4	3	2
1	21	1	3	0	0	0	2	2	1	3	1	2	0	0	0	2	2	19	5	6	5	2	5	1	1	1	5	6	5	5	5	5	5	5	5	2	1	5	2	2	5	7	6	4	4	6	1	1	3
2	23	1	1	2	2	0	2	2	0	4	0	1	0	0	3	2	0	20	5	5	1	3	4	1	7	4	6	6	4	5	1	5	5	2	1	1	1	1	3	5	5	5	5	4	1	3	7	6	7
1	22	1	1	1	1	0	2	0	1	2	3	0	1	2	3	2	2	22	2	5	2	3	2	2	1	2	1	5	2	4	2	5	3	6	4	2	4	3	6	4	3	2	2	2	2	3	2	5	4
2	22	1	0	2	2	1	0	0	0	3	1	0	0	0	3	2	2	17	5	6	3	3	2	2	2	2	3	6	4	3	2	2	6	4	2	2	1	2	3	5	2	5	6	6	2	4	6	5	3
1	26	1	1	2	0	0	0	0	1	3	0	3	1	0	0	0	0	12	2	2	2	1	1	1	3	3	3	3	5	6	6	4	4	6	6	6	5	5	2	2	4	3	4	3	2	2	2	2	2
2	21	2	1	1	3	1	2	0	2	3	0	1	0	0	1	3	2	22	7	7	5	5	5	3	1	4	5	3	2	5	5	2	2	3	4	3	5	2	3	2	2	5	5	6	2	5	2	1	3
2	22	3	3	2	4	2	3	3	4	4	1	4	0	1	2	4	3	43	5	6	5	4	5	3	6	4	3	6	5	5	5	4	6	2	5	5	2	6	4	7	1	6	7	5	2	5	7	7	6
2	22	0	0	0	1	1	1	0	0	0	0	0	0	0	1	1	0	5	2	4	2	2	2	2	1	2	2	2	3	3	2	3	2	6	1	1	1	1	2	2	3	2	2	1	1	1	2	2	5
1	22	2	2	0	2	2	2	2	3	3	0	2	0	0	0	3	2	25	4	4	6	5	4	3	2	2	5	5	6	5	4	5	6	6	6	3	3	3	3	5	2	6	7	5	3	6	4	3	4
1	22	1	2	2	2	1	1	1	2	3	2	0	1	0	2	2	1	23	4	5	3	2	1	1	2	2	2	4	5	4	3	3	5	5	5	3	3	6	2	3	2	4	3	2	2	5	2	1	3
1	21	0	0	1	1	0	0	0	0	3	0	1	0	0	0	0	0	6	2	4	4	2	1	1	1	1	4	1	5	1	1	1	1	4	3	1	1	1	1	1	1	1	2	1	1	2	4	3	4
2	22	1	2	1	0	1	0	0	0	2	1	0	0	0	3	2	2	15	4	5	7	6	6	2	2	5	2	6	3	5	2	2	2	5	2	6	2	1	6	6	6	6	6	3	5	6	6	2	3
2	22	0	1	0	2	1	0	0	0	2	0	0	0	0	2	0	1	9	3	4	2	1	3	1	2	1	2	1	4	4	5	5	5	2	1	1	1	1	1	1	1	5	4	1	3	3	5	4	5
1	23	0	2	0	1	0	0	1	1	2	0	0	1	0	3	2	2	15	4	6	4	4	5	3	2	4	4	5	3	4	2	4	2	2	2	4	4	4	6	6	4	6	5	5	5	4	4	4	4
1	22	1	1	0	0	0	0	0	1	1	0	1	0	0	2	2	1	10	3	6	1	1	1	1	1	1	6	1	4	1	1	4	2	5	2	1	5	2	1	1	2	1	1	1	1	5	1	2	2
1	24	1	3	2	2	2	3	3	1	1	0	2	1	1	3	2	2	29	4	5	5	5	5	4	3	4	4	3	3	4	5	4	5	5	4	4	4	3	5	6	5	6	5	4	3	6	5	5	4
1	24	2	3	0	3	2	1	3	3	3	2	4	2	2	0	3	2	35	2	5	1	3	1	1	1	4	4	2	5	5	1	1	5	6	2	2	5	1	3	3	7	6	3	5	1	3	7	6	6
1	26	0	1	0	0	0	0	0	0	3	0	0	0	0	2	0	1	7	4	5	3	2	1	1	1	5	2	4	4	2	2	2	2	5	3	5	1	1	1	1	1	1	1	1	1	4	1	1	2
1	23	1	2	1	1	1	0	0	1	3	1	0	0	0	3	0	1	15	5	5	3	5	5	5	3	5	5	5	4	5	2	2	5	5	2	2	2	2	5	5	5	6	5	5	4	4	5	5	4
1	24	2	1	2	4	2	2	2	1	2	1	0	1	2	0	2	2	26	6	5	5	2	5	2	2	2	4	3	4	5	5	5	4	5	3	3	3	5	2	2	4	3	7	4	2	4	5	2	7
1	24	0	0	0	0	0	0	0	0	1	0	0	0	0	0	0	0	1	2	1	1	1	1	1	1	1	1	5	5	1	1	1	1	4	1	3	1	1	1	1	1	1	1	1	1	1	1	1	1
1	21	2	3	2	2	2	3	3	3	4	0	0	2	1	0	4	3	34	7	7	1	1	4	1	1	1	1	4	4	6	2	3	5	4	3	2	6	5	4	4	4	4	4	4	4	4	4	3	6
1	24	0	3	0	0	1	0	0	0	0	0	2	2	1	1	2	1	13	1	1	2	1	2	2	2	2	3	1	7	6	6	5	6	5	7	5	6	5	5	4	7	6	6	1	1	1	5	3	5
1	21	0	1	0	1	1	0	0	0	0	0	0	0	0	0	1	1	5	1	2	1	1	1	1	1	4	4	4	7	6	6	1	1	5	2	4	4	4	1	1	1	1	1	1	1	1	1	1	4
1	23	0	2	2	0	0	0	0	0	0	0	0	0	0	0	2	1	7	3	4	1	1	1	1	1	1	1	1	5	5	4	1	1	5	1	1	1	1	1	1	1	5	2	1	1	1	4	1	4
1	23	0	1	0	0	0	0	0	0	1	0	0	0	0	0	0	0	2	4	5	4	3	4	3	2	3	3	4	3	4	5	4	3	5	5	5	3	3	2	2	5	5	3	2	3	2	2	2	4
2	23	0	1	1	2	0	1	0	0	2	0	0	0	0	4	0	0	11	6	6	6	7	5	3	4	2	2	4	2	2	2	2	2	2	2	6	2	2	2	2	2	5	3	3	2	5	5	5	2
1	23	1	3	3	4	2	1	0	1	4	0	1	1	2	0	1	3	27	3	2	2	1	2	2	2	1	5	4	6	7	5	3	5	6	5	2	3	4	2	1	1	5	6	7	3	6	3	4	2
1	22	1	2	2	2	2	2	1	1	2	1	1	1	1	2	2	2	25	6	6	3	3	5	3	3	4	3	3	3	3	3	3	3	3	3	3	3	3	3	2	3	4	4	4	3	3	3	3	6
2	22	2	3	1	2	1	0	1	2	2	1	1	1	2	3	3	1	26	5	4	3	3	3	4	2	2	4	3	#NULL!	3	4	4	5	5	5	2	3	3	2	5	4	5	4	6	2	5	5	7	5
2	24	1	3	3	3	4	4	4	2	2	0	3	2	1	1	3	3	39	5	6	5	4	4	5	2	2	2	2	2	2	2	1	4	3	3	4	4	3	5	7	7	7	7	7	7	7	6	7	7
2	22	0	2	1	2	2	2	2	1	0	0	1	0	0	2	2	2	19	6	6	2	4	5	3	1	1	1	6	6	6	2	4	1	6	6	5	2	2	2	1	6	2	3	1	1	1	4	2	6
2	27	0	0	0	0	0	0	0	0	0	0	0	0	0	2	0	0	2	5	6	4	4	5	3	5	3	6	6	4	3	3	3	5	4	6	5	3	3	4	3	5	4	4	4	6	4	4	4	5
2	24	1	3	4	3	3	1	0	0	3	0	2	1	0	3	3	4	31	5	5	2	4	6	4	1	1	5	5	5	5	6	6	6	6	6	6	6	6	2	1	6	6	7	7	2	6	6	6	7
2	26	1	2	2	1	0	0	0	0	2	0	1	1	0	0	1	2	13	4	3	4	4	5	2	2	2	4	6	6	6	6	2	5	6	6	6	4	6	5	5	6	6	4	6	2	5	5	6	5
2	21	2	3	3	3	2	1	1	2	3	0	0	3	0	0	2	2	27	4	4	4	4	4	4	1	4	4	4	4	5	5	5	5	6	4	4	4	4	5	5	2	6	6	3	1	5	5	5	5
2	21	1	2	4	1	0	0	0	0	3	0	0	2	0	3	0	0	16	7	7	6	7	7	2	1	3	3	2	1	1	1	1	1	1	3	5	1	1	2	2	5	5	2	1	1	6	3	5	5
1	21	0	2	2	0	2	0	0	0	3	0	0	0	0	0	2	1	12	1	5	5	1	3	2	2	1	1	1	3	2	1	1	1	1	1	1	1	1	1	1	3	1	1	1	1	1	1	1	1
2	21	2	0	1	2	0	0	0	2	2	3	1	2	0	3	2	3	23	7	7	4	3	7	3	1	2	2	2	2	6	2	1	1	7	2	2	2	2	1	1	1	6	7	7	1	4	1	6	7
1	24	0	0	0	0	0	0	0	0	0	0	0	0	0	0	0	0	0	1	4	1	1	1	1	1	1	1	4	4	2	1	1	1	4	4	1	1	1	1	1	1	1	1	1	1	1	1	1	1
1	21	3	2	1	3	1	0	2	1	0	0	1	2	0	0	2	1	19	2	6	2	1	1	2	1	1	4	6	3	6	7	4	5	7	7	4	5	7	5	7	4	7	7	7	6	7	7	4	3
1	22	0	1	0	2	1	2	1	1	3	1	1	1	0	0	2	2	18	2	6	5	3	3	3	1	3	3	2	4	3	3	3	4	5	5	5	5	3	7	7	4	6	6	4	2	5	5	5	4
1	21	2	2	2	2	2	2	1	2	1	2	2	1	2	2	2	2	29	5	5	4	4	4	4	4	4	4	4	3	4	4	5	5	4	4	4	4	5	5	5	5	5	5	5	5	6	5	5	4
1	22	1	2	1	2	1	1	2	2	4	1	1	1	1	2	1	1	24	2	4	4	4	2	2	1	1	4	4	7	7	4	4	4	6	2	1	2	2	2	2	1	2	3	5	2	4	2	4	2
2	21	0	0	0	0	0	0	0	0	0	0	0	0	0	1	0	1	2	4	7	5	2	1	1	1	1	4	4	1	5	2	4	4	5	2	2	2	1	2	2	2	2	4	4	2	4	2	2	2
1	21	3	2	4	3	2	0	0	0	2	0	0	0	0	0	1	2	19	2	4	1	1	1	1	1	2	1	4	5	2	1	1	2	5	1	1	1	1	5	4	2	4	2	5	1	1	4	1	3
1	21	0	1	0	1	0	0	0	0	0	0	0	0	0	0	1	0	3	3	2	3	2	2	1	1	1	1	1	6	4	4	2	3	6	4	3	1	1	1	1	6	1	4	3	2	2	2	2	4
2	34	1	1	1	0	0	0	0	1	0	0	0	0	0	0	2	0	6	5	5	1	1	1	1	5	1	5	5	2	2	5	1	1	1	1	1	1	1	2	6	2	5	4	5	2	2	2	2	4
2	22	1	2	1	2	1	1	0	1	3	0	0	1	1	2	1	2	19	3	5	5	4	6	4	0	3	3	4	4	4	4	4	3	4	3	3	3	3	2	2	2	6	4	2	1	4	4	4	5
1	21	0	1	0	2	0	0	0	0	1	0	0	0	0	3	0	0	7	6	6	2	1	2	1	1	2	4	6	3	3	2	2	2	4	6	2	1	1	6	6	2	4	3	6	5	3	2	2	3
2	21	0	2	2	2	0	1	1	0	3	0	0	0	0	3	1	0	15	6	7	5	5	4	3	5	4	5	4	3	5	4	3	4	3	4	2	4	3	3	3	6	4	4	5	5	6	4	3	3
1	22	2	3	1	1	1	2	2	2	1	2	2	2	3	1	3	2	30	4	5	3	3	2	2	2	2	2	2	2	2	2	2	2	2	2	2	2	2	2	2	3	4	4	4	2	2	3	3	4
2	22	0	2	0	0	0	1	1	0	0	0	2	1	0	0	3	2	12	2	3	4	4	4	4	4	4	4	6	4	3	3	3	6	5	4	3	3	4	4	2	5	5	6	5	3	4	3	6	5
2	21	0	2	0	2	3	2	2	1	3	2	2	1	0	3	1	2	26	5	5	5	5	4	3	1	6	5	4	2	4	5	5	2	6	2	4	4	3	3	2	1	5	3	4	1	1	1	3	5
1	21	0	0	0	2	0	0	0	0	2	0	0	1	0	1	0	0	6	4	5	6	4	3	1	1	3	5	4	4	2	1	1	1	6	4	3	3	4	5	6	1	1	5	1	1	1	1	5	7
2	24	0	1	1	1	1	0	0	0	1	0	0	0	0	3	0	0	8	2	3	2	2	1	1	1	1	1	1	5	5	2	1	1	2	1	1	1	1	2	2	2	2	2	2	2	2	2	2	2
1	21	0	1	1	2	1	1	0	1	2	0	1	1	0	1	2	2	16	5	5	3	2	3	1	1	1	1	5	5	6	5	4	2	6	3	2	2	5	4	3	2	6	6	6	5	5	3	2	1
1	23	2	1	3	2	0	0	0	0	2	0	1	0	0	2	0	1	14	5	6	3	5	6	4	3	4	5	4	4	4	5	6	6	5	3	4	3	2	4	5	4	3	4	5	4	3	4	3	4
1	26	0	0	0	0	0	0	0	0	2	0	0	0	0	0	0	1	3	7	6	1	1	1	1	1	1	1	1	1	3	2	2	5	5	2	2	6	1	3	2	2	5	5	6	1	1	1	4	4
2	22	2	3	1	3	2	2	2	2	3	0	2	1	1	4	3	3	34	6	6	4	4	6	3	1	3	2	6	1	4	2	2	1	7	1	4	1	1	1	1	4	4	5	2	4	4	4	5	7
1	21	0	0	0	0	0	3	2	1	0	0	3	0	0	2	0	0	11	2	4	4	3	3	4	2	3	2	2	5	5	3	2	2	4	2	2	2	2	2	1	3	3	3	3	2	5	4	3	5
1	22	0	0	1	1	0	0	1	1	0	0	1	1	0	0	0	1	7	2	6	2	2	1	2	2	3	3	3	4	3	1	3	1	4	3	3	2	1	2	3	3	4	4	1	2	2	2	2	3
1	22	1	0	0	0	0	0	0	0	3	0	0	0	0	1	0	0	5	4	4	5	2	4	3	2	2	5	4	2	1	2	2	5	2	2	2	2	3	2	2	2	3	2	3	2	6	3	4	2
2	21	2	3	1	1	2	1	1	2	2	0	1	0	2	4	4	2	28	7	7	3	5	2	3	1	2	2	6	3	6	6	6	3	7	4	2	2	3	4	2	6	6	6	6	2	5	6	6	7
2	22	0	2	1	3	2	1	0	0	2	0	0	0	0	0	2	2	15	6	6	4	1	5	4	3	3	2	6	2	2	1	1	5	3	1	1	1	1	6	6	2	5	5	6	5	6	5	6	4
1	28	0	0	0	1	0	0	0	0	2	0	0	0	0	0	0	0	3	1	4	5	3	3	5	2	2	5	6	5	5	4	3	3	5	5	3	2	3	4	5	5	5	5	3	3	5	4	5	3
1	20	2	3	1	1	2	1	0	1	3	0	0	1	1	3	2	3	24	5	6	2	2	5	2	2	4	5	4	2	2	2	2	2	5	4	4	2	2	4	2	3	5	2	6	1	2	3	5	2
2	20	2	1	2	2	0	1	0	0	0	1	0	0	0	0	2	0	11	6	6	2	1	2	2	1	3	3	1	1	3	1	1	5	5	3	3	5	2	3	4	2	6	3	2	5	7	3	5	7
2	20	1	3	2	3	3	0	0	0	3	2	3	0	1	3	3	3	30	6	3	4	2	2	1	1	5	5	5	6	6	5	1	1	6	1	1	1	4	1	1	6	6	6	6	4	5	2	6	6
2	25	0	1	2	2	0	0	0	0	2	1	0	0	0	4	1	1	14	7	7	5	5	3	3	1	1	1	7	3	1	1	2	1	4	1	1	1	1	1	1	7	4	2	4	1	1	1	1	5
2	23	1	2	3	3	3	2	2	2	2	0	3	1	1	1	2	2	30	4	5	5	3	3	3	3	3	3	3	3	5	5	5	5	5	5	5	5	5	4	2	2	3	5	2	2	2	4	2	6
2	20	2	2	1	2	1	2	1	2	1	0	1	0	0	3	2	1	21	7	7	4	1	1	2	2	2	2	2	2	4	5	1	3	4	2	2	2	2	3	4	3	5	4	2	3	2	2	2	6
2	23	1	3	0	2	2	2	2	2	1	0	2	2	1	4	2	3	29	6	6	6	5	2	3	2	2	2	7	2	2	2	2	6	5	5	4	1	1	3	5	6	6	5	3	3	5	3	3	6
2	21	1	2	1	0	1	0	0	1	2	0	0	0	0	1	1	3	13	6	6	4	3	5	4	2	3	5	4	4	5	3	2	5	4	5	3	4	5	5	4	4	4	5	5	5	5	6	4	6
1	22	1	1	1	1	1	2	1	1	2	0	0	1	0	3	0	1	16	6	6	4	5	4	3	1	2	4	3	3	3	3	2	2	6	5	2	5	4	3	3	3	3	5	4	3	2	2	5	3
1	21	1	3	1	1	0	2	0	0	1	0	0	0	1	1	3	2	16	3	5	2	1	3	2	2	3	2	2	3	3	2	2	2	6	2	1	3	2	5	2	5	2	3	2	2	3	5	6	3
1	27	1	1	1	1	0	0	1	1	1	0	1	0	0	1	1	1	11	5	3	4	2	4	1	1	2	2	5	5	6	4	2	2	6	1	1	1	1	1	1	5	3	4	3	3	4	3	3	3
2	21	0	2	1	3	1	0	1	1	3	0	1	0	2	1	2	2	20	5	5	3	2	2	2	1	2	2	1	3	2	2	2	2	5	3	2	1	1	6	4	5	3	5	2	4	5	2	2	5
2	21	0	1	2	1	0	0	0	0	2	0	0	0	0	1	1	1	9	5	6	2	2	2	2	1	2	1	5	5	7	3	1	2	5	3	2	2	1	3	3	6	5	6	5	2	5	2	6	5
1	24	0	2	0	0	0	0	0	0	2	0	0	0	0	0	0	2	6	2	5	1	1	1	1	1	1	1	5	5	2	1	1	1	1	1	1	6	1	4	5	1	5	2	5	1	1	1	1	5
1	23	1	2	2	1	3	3	3	1	4	2	2	1	4	2	3	3	37	6	6	4	3	4	5	3	2	4	6	3	3	6	5	5	6	6	4	3	4	5	5	6	6	7	7	6	7	7	7	6
2	38	1	2	2	1	1	0	1	0	2	1	0	1	0	2	0	1	15	4	4	4	4	5	4	3	3	4	5	3	3	4	4	4	3	3	3	2	2	4	4	5	5	5	4	5	5	5	4	4
1	21	0	1	1	1	1	2	0	0	0	0	0	0	1	0	1	1	9	4	4	5	3	1	2	3	4	4	5	5	5	5	5	5	5	3	2	2	2	2	3	2	5	4	3	2	4	2	2	5
1	21	1	2	1	0	1	0	0	0	1	0	0	0	0	1	1	1	9	4	4	2	2	1	1	4	4	5	1	4	1	1	1	1	4	1	1	5	1	4	4	3	3	4	4	2	2	2	5	3
2	20	2	4	3	3	2	1	1	3	4	1	2	3	3	4	3	4	43	5	6	4	3	6	5	3	2	5	4	3	2	1	1	1	4	4	2	4	1	6	4	7	7	7	4	4	6	7	7	5
1	21	0	0	1	1	0	0	0	0	2	0	0	0	0	1	0	0	5	4	4	5	4	5	1	2	4	2	4	4	2	2	2	5	5	2	6	2	2	4	4	5	6	5	4	3	5	5	3	5
2	20	2	2	2	3	1	1	0	1	1	0	1	2	0	3	2	1	22	6	6	4	5	3	3	2	3	4	6	1	5	2	2	2	5	3	2	1	1	2	2	2	2	6	2	2	2	2	2	2
2	22	0	2	2	2	1	1	1	0	1	0	1	0	0	2	1	2	16	6	6	3	2	6	5	2	4	2	4	3	3	3	1	5	5	4	2	5	1	4	5	6	6	5	6	4	4	6	5	6
1	21	1	2	0	2	1	0	0	2	0	0	0	0	2	1	3	1	15	3	5	5	1	1	4	1	1	5	6	6	6	5	1	5	1	1	1	1	6	4	5	6	4	6	1	4	6	5	5	3
2	21	2	3	1	1	1	2	0	0	1	0	1	1	0	1	2	2	18	5	5	5	4	5	5	3	3	5	3	4	5	3	5	5	5	4	3	5	4	6	6	6	6	6	5	5	5	6	5	6
2	21	0	1	1	3	2	0	0	0	1	1	0	1	0	2	1	1	14	5	5	3	4	2	1	1	1	5	4	4	4	2	4	5	5	3	2	3	3	2	2	2	2	3	4	3	5	3	2	4
2	22	1	1	1	2	1	0	0	0	3	1	0	0	1	2	2	1	16	5	6	4	3	5	3	1	1	5	2	2	5	4	5	4	6	2	1	6	5	5	5	5	5	6	3	6	6	4	5	6
2	22	1	3	0	2	1	0	0	2	3	0	2	1	0	4	3	3	25	6	7	6	6	4	3	2	6	2	6	2	4	1	5	2	4	2	2	2	2	4	3	2	5	6	1	2	5	6	3	6
2	21	2	2	2	3	3	0	2	0	3	2	1	2	0	1	2	2	27	5	5	3	1	1	2	3	1	5	2	4	6	6	3	1	5	5	1	6	3	6	6	1	4	7	7	2	5	2	6	1
1	22	1	2	3	1	2	0	0	1	0	0	0	0	0	3	2	1	16	2	6	3	5	1	1	1	4	5	6	4	2	1	2	1	5	2	2	2	2	2	2	2	2	3	4	2	2	3	5	3
1	23	2	3	0	2	3	0	0	0	3	1	0	0	0	4	3	3	24	7	4	5	6	5	1	6	1	1	1	4	6	7	1	4	6	1	1	1	1	5	6	5	7	7	1	3	5	1	1	1
1	23	2	1	2	2	0	0	0	2	1	0	0	1	0	1	0	1	13	5	5	2	3	2	2	2	4	1	2	3	3	3	2	3	4	4	6	4	2	4	4	2	5	5	5	4	4	6	7	6
[truncated: 60 more columns]
